# Supplementary material for: Bimetallic synergistic degradation of chlorophenols by CuCoOx–LDH catalyst in bicarbonate-activated hydrogen peroxide system
Source: Royal Society of Chemistry journal article supplement (doi:10.1039/c6ra10402a), 2016-01-01
Supplement: c6ra10402a1.pdf [file c6ra10402a1.pdf]

### Supporting information

## Bimetallic Synergistic Degradation of Chlorophenols by $\text{CuCoO}_x$ -LDH Catalyst in bicarbonate activated hydrogen peroxide system.

Ali Jawad<sup>1</sup>, Yibing Li<sup>1,3</sup>, Nianshuang Guo<sup>1</sup>, Aimal Khan<sup>1</sup>, Zhuqi Chen<sup>1</sup>, Jinyu Wang<sup>1</sup>,  
Jiakuan Yang<sup>2</sup>, Weidong Liu<sup>3</sup>, Guochuan Yin<sup>1\*</sup>

<sup>1</sup>School of Chemistry and Chemical Engineering, Hubei Key Laboratory of Material Chemistry and Service Failure, Huazhong University of Science and Technology, Wuhan 430074, PR China; Key laboratory of Material Chemistry for Energy Conversion and Storage (Huazhong University of Science and Technology), Ministry of Education, PR China;

<sup>2</sup>School of Environmental Science and Engineering, Huazhong University of Science and Technology, Wuhan 430074, PR China;

<sup>3</sup>College of Chemistry and Life Sciences, Zhejiang Normal University, Jinhua 321004, PR China.

**Contents:**

**Table S1** Activity of different LDH based metals catalyst on common MgAl support in BAP system.

**Figure S1** TGA analysis of CuCoO<sub>x</sub>-LDH-2 catalyst.

**Figure S2** TEM images of CuCoO<sub>x</sub>-LDH-2 catalyst.

**Figure S3** Effect of temperature on the catalytic activity of CuCoO<sub>x</sub>-LDH-2 catalyst.

**Figure S4** Effect of reaction pH on the efficiency of CuCoO<sub>x</sub>-LDH-2 catalyst.

**Figure S5** Influence of H<sub>2</sub>O<sub>2</sub> amount on the efficiency of CuCoO<sub>x</sub>-LDH-2 catalyst.

**Figure S6** Effect of bicarbonate concentration on the activity of CuCoO<sub>x</sub>-LDH-2 catalyst.

**Figure S7** Scavenging action of NaN<sub>3</sub> during degradation of 4-CP.

**Figure S8** Scavenging action of iso propyl alcohol on degradation of 4-CP.

**Figure S9** Influence of benzoquinone on the degradation of 4-CP.

**Figure S10** Generation of hydroxyl and superoxide oxide radical with DMPO and BPN

**Figure S11** Stability of CuCoO<sub>x</sub>-LDH-2 catalyst in repeated run

**Figure S12** XRD pattern of CuCoO<sub>x</sub>-LDH-2 catalyst during repeated use.

**Table S1** Activity of different LDH based metals catalyst on common MgAl support in BAP system.

| Catalyst                 | mM of nitrate salt solution used |                  |                  | BET<br>(m <sup>2</sup> /g) | (Co <sup>2+</sup> +Mg <sup>2+</sup> )/Al <sup>3+</sup> | % Co<br>load | pH   | % CP<br>removal |
|--------------------------|----------------------------------|------------------|------------------|----------------------------|--------------------------------------------------------|--------------|------|-----------------|
|                          | Co <sup>2+</sup> /other          | Mg <sup>2+</sup> | Al <sup>3+</sup> |                            |                                                        |              |      |                 |
| CoO <sub>x</sub> -LDH-1  | 0.075                            | 15               | 5                | 92                         | 3.015                                                  | 0.60         | 8.68 | 72              |
| CoO <sub>x</sub> -LDH -2 | 0.150                            | 15               | 5                | 94                         | 3.030                                                  | 0.78         | 8.65 | 60              |
| CoO <sub>x</sub> -LDH -3 | 0.225                            | 15               | 5                | 94                         | 3.045                                                  | 1.11         | 8.66 | 54              |
| CuO <sub>x</sub> -LDH    | 1                                | 15               | 5                | 84                         | -                                                      | -            | 8.53 | 42              |
| MnO <sub>x</sub> -LDH    | 1                                | 15               | 5                | 61                         | -                                                      | -            | 8.58 | 25              |
| FeO <sub>x</sub> -LDH    | 1                                | 15               | 5                | 57                         | -                                                      | -            | 8.49 | 27              |
| ZnO <sub>x</sub> -LDH    | 1                                | 15               | 5                | 64                         | -                                                      | -            | 8.51 | 30              |
| NiO <sub>x</sub> -LDH    | 1                                | 15               | 5                | 81                         | -                                                      | -            | 8.59 | 28              |
| MgAl as LDH              | -                                | 15               | 5                | 82                         | 3.0                                                    |              | 8.72 | 15              |

**Conditions:** CP 100 ppm, H<sub>2</sub>O<sub>2</sub> 30 mM, NaHCO<sub>3</sub> 30 mM, temperature 40 °C, catalyst amount

1.5 g/L, reaction time 1 h.

### Thermal stability of CuCoO<sub>x</sub>-LDH-2 catalyst

The DGA analysis as shown in Figure S1 indicates the weight loss on thermal heating. The first mass loss occurred at 250 °C, mainly associated with interlayer and weakly adsorbed water. From temperature 250-500°C, the mass loss is associated with CO<sub>3</sub><sup>2-</sup>, NO<sub>3</sub><sup>-</sup> and other intercalated anions chemically bonded with metals layers. The weight loss after 500 °C may be related to traces of CO<sub>3</sub><sup>2-</sup> left after calcination.

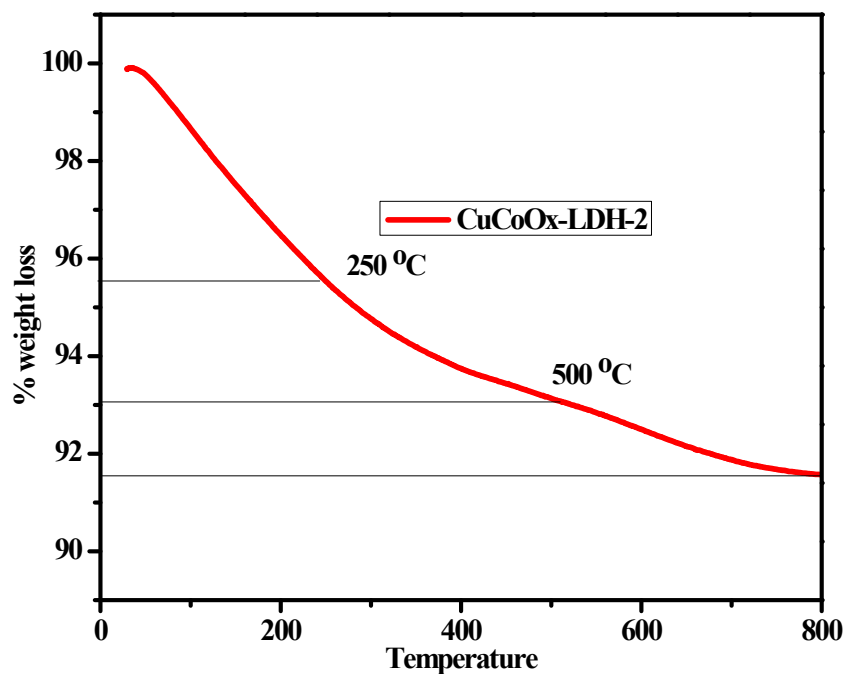

**Figure S1** TGA analysis of CuCoO<sub>x</sub>-LDH-2 catalyst.

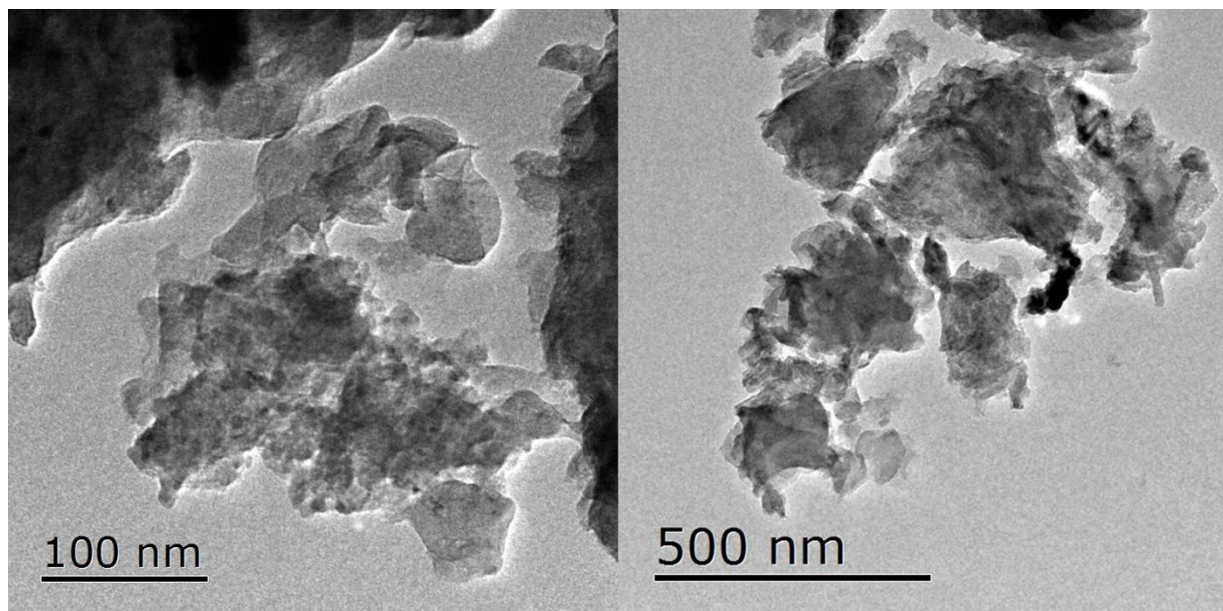

**Figure S2** TEM images of CuCoO<sub>x</sub>-LDH-2 catalyst.

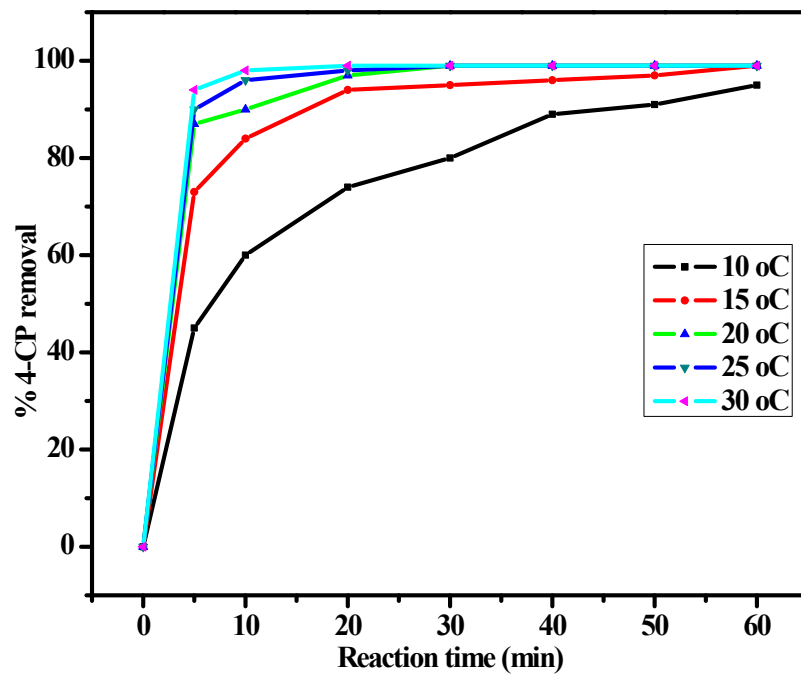

**Figure S3** Effect of temperature on the catalytic activity of CuCoO<sub>x</sub>-LDH-2 catalyst.

Conditions: 4-CP 100 ppm, H<sub>2</sub>O<sub>2</sub> 25 mM, NaHCO<sub>3</sub> 30 mM, amount of catalyst 0.5 g/L, pH 8.66, temperature 30 °C.

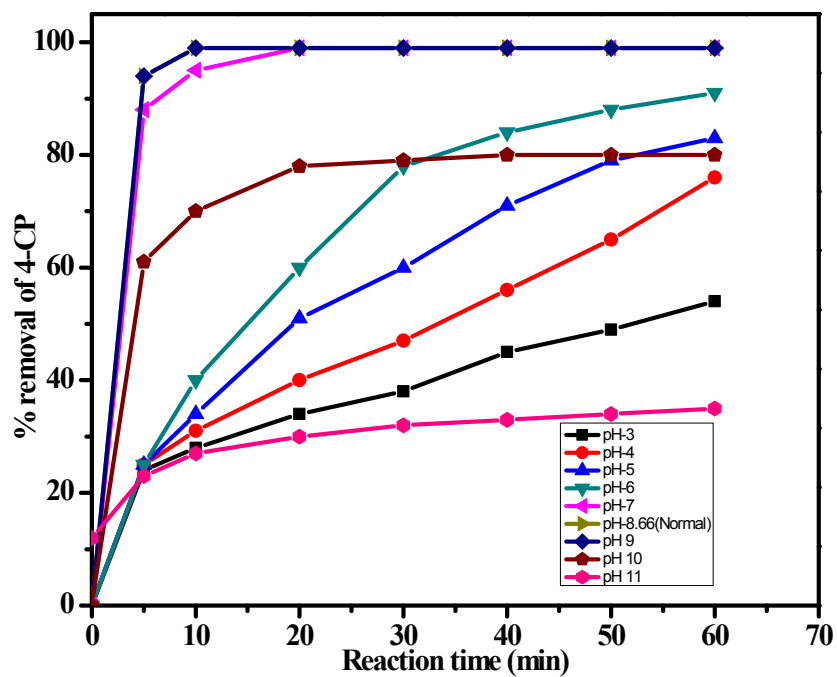

**Figure S4** Effect of reaction pH on the efficiency of  $\text{CuCoO}_x\text{-LDH-2}$  catalyst.

Conditions: CP 100 ppm,  $\text{H}_2\text{O}_2$  25 mM,  $\text{NaHCO}_3$  30 mM, amount of catalyst 0.5 g/L,  
temperature 30 °C.

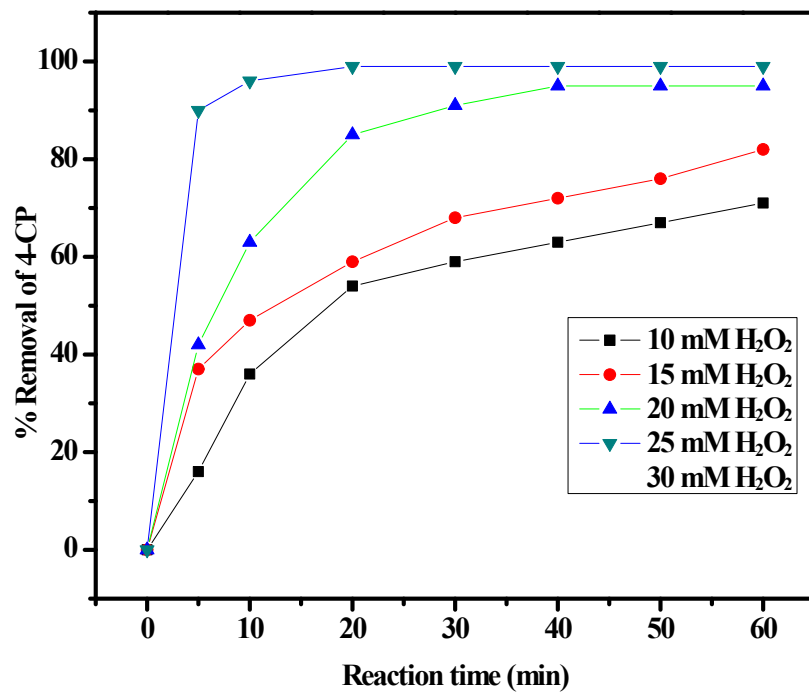

**Figure S5** Influence of H<sub>2</sub>O<sub>2</sub> on the efficiency of CuCoO<sub>x</sub>-LDH-2 catalyst.

Conditions: CP 100 ppm, NaHCO<sub>3</sub> 30 mM, amount of catalyst 0.5 g/L, temperature 30 °C at pH

8.63 ± 0.3.



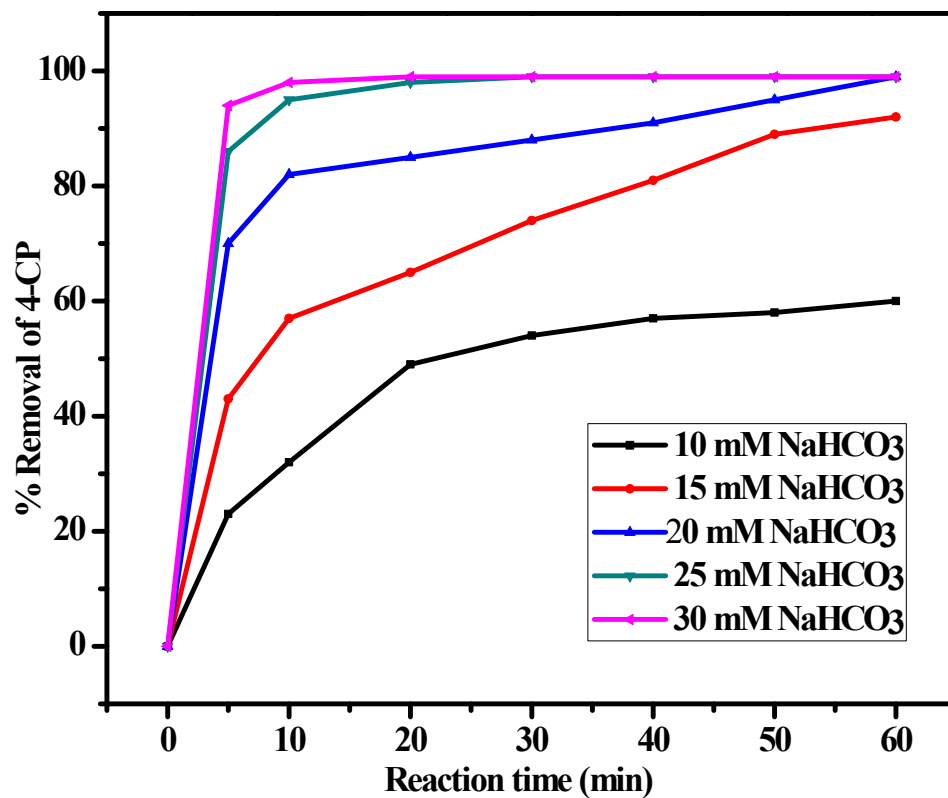

**Figure S6** Effect of bicarbonate concentration on the activity of CuCoO<sub>x</sub>-LDH-2 catalyst.

Conditions: CP 100 ppm, H<sub>2</sub>O<sub>2</sub> 25 mM, amount of catalyst 0.5 g/L, temperature 30 °C at pH

8.62 ± 0.4.

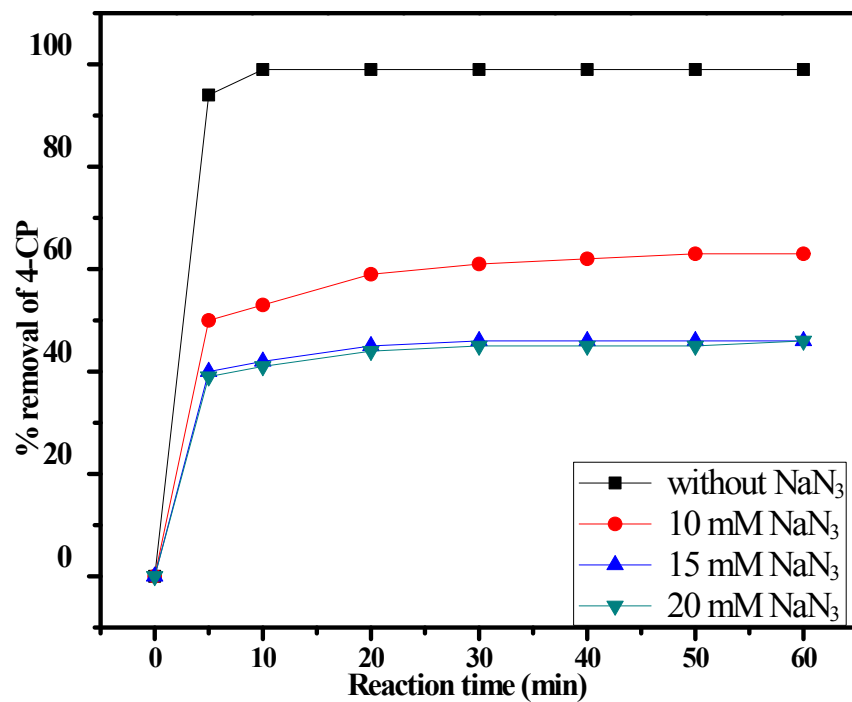

**Figure S7** Scavenging role of NaN<sub>3</sub> during degradation of 4-CP.

Conditions: CP 200 ppm, H<sub>2</sub>O<sub>2</sub> 25 mM, NaHCO<sub>3</sub> 30 mM, amount of catalyst 0.5 g/L,  
temperature 30 °C.

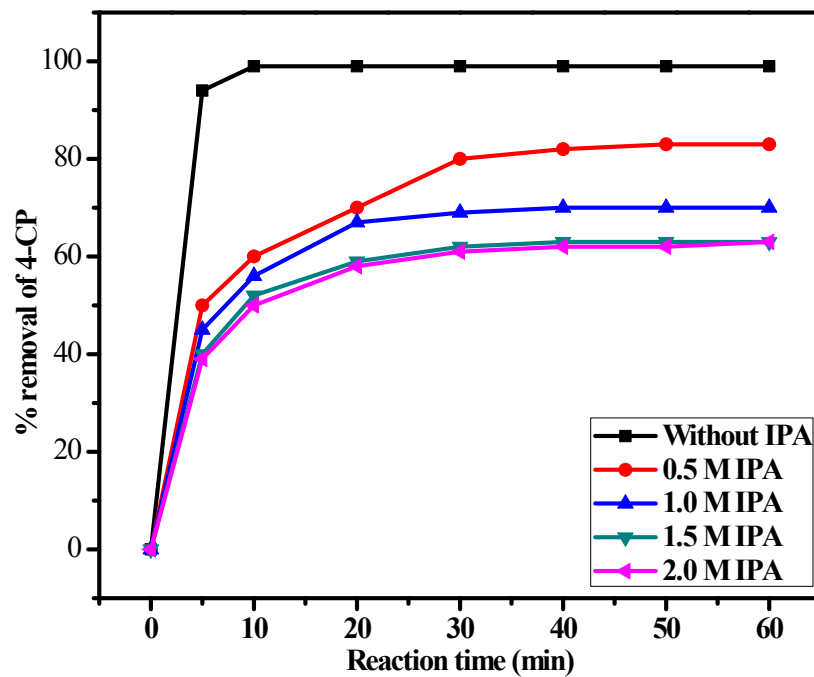

**Figure S8** Scavenging action of iso propyl alcohol (IPA) during degradation of 4-CP.

Conditions: CP 200 ppm, H<sub>2</sub>O<sub>2</sub> 25 mM, NaHCO<sub>3</sub> 30 mM, amount of catalyst 0.5 g/L,  
temperature 30 °C.

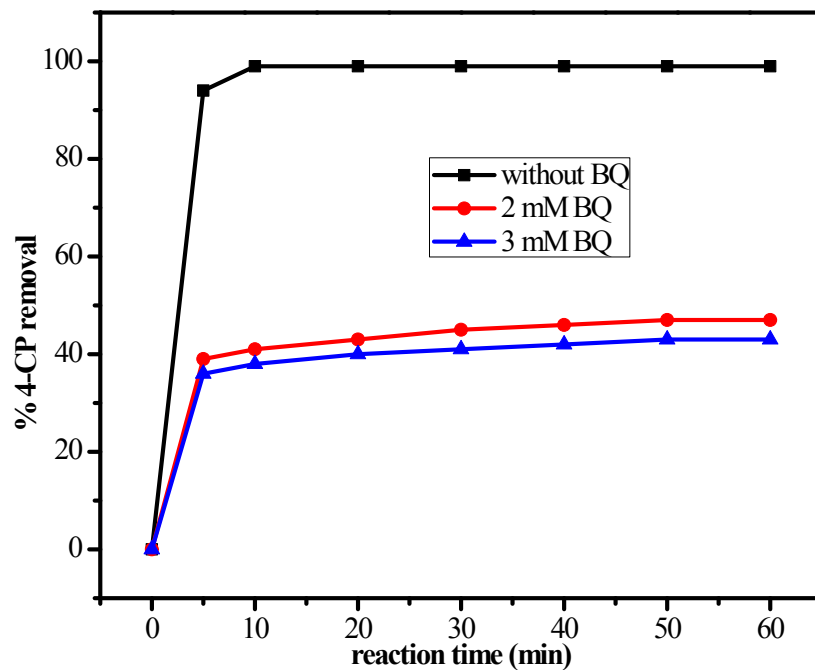

**Figure S9** Influence of benzoquinone on the degradation of 4-CP.

Conditions: CP 200 ppm,  $\text{H}_2\text{O}_2$  25 mM,  $\text{NaHCO}_3$  30 mM, amount of catalyst 0.5 g/L,

temperature 30 °C.

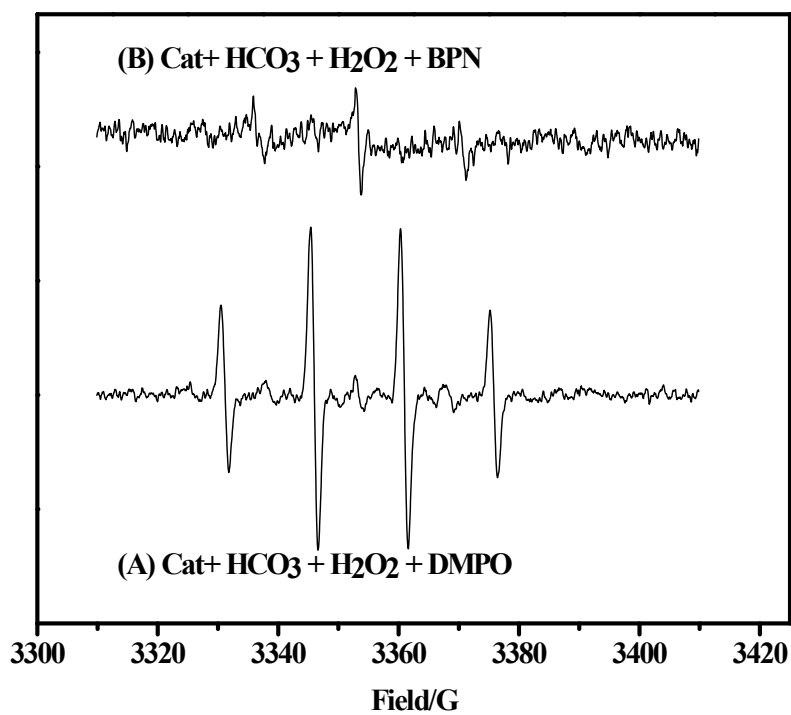

**Figure S10** Generation of hydroxyl and superoxide radicals with DMPO and BPN  
Conditions: DMPO 100 mM, BPN 50 mM, NaHCO<sub>3</sub> 30 mM, H<sub>2</sub>O<sub>2</sub> 30 mM, 10 mg/5 mL sample,  
10 min reaction time, room temperature.

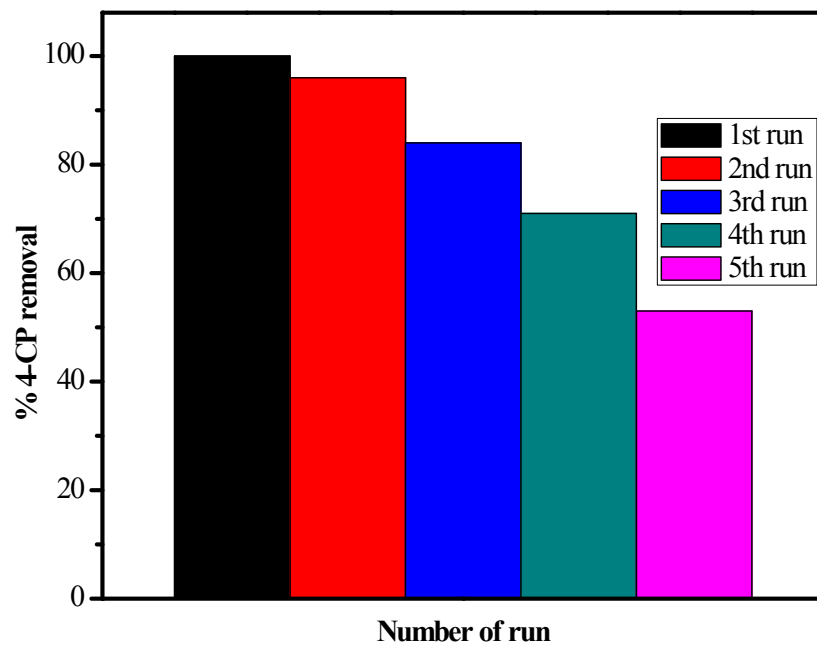

**Figure S11** Stability of CuO<sub>x</sub>@Co-LDH-2 catalyst in repeated run

Conditions: 4-CP 100 ppm, H<sub>2</sub>O<sub>2</sub> 25 mM, NaHCO<sub>3</sub> 30 mM, 0.5 g/L catalyst, time 1 h,  
temperature 30 °C.

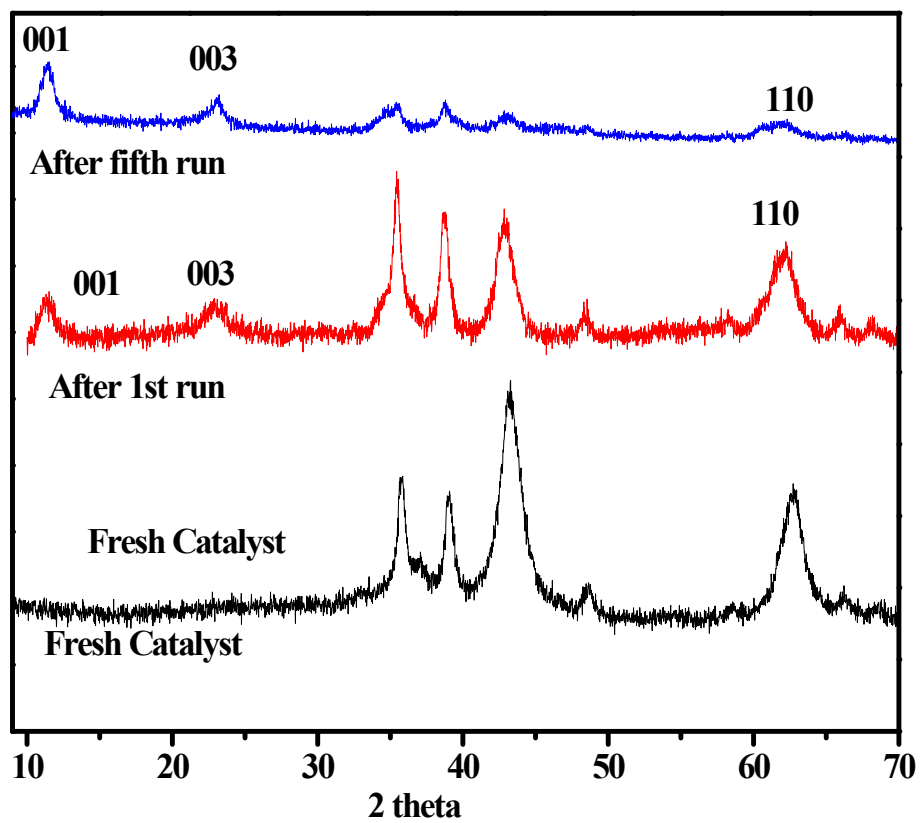

Figure S12 XRD pattern of CuCoO<sub>x</sub>-LDH-2 catalyst during repeated use.
